# Supplementary material for: Insights in to the pathogenesis of axial spondyloarthropathy based on gene expression profiles
Source: PubMed Central journal article supplement (PMC3003511; doi:10.1186/ar2855), 2009-11-09
Supplement: ar2855-S2.pdf [file ar2855-S2.pdf]

**Supplementary Table 1**

Probe sets indicating genes with significantly ( $q < 5\%$ ) higher or lower expression in patients with axial spondyloarthritis compared to control subjects in Set 1 and Set 2.

\*X- or Y-linked gene.

| Probe Set ID | Gene Symbol | Gene Title                                                             | Set 1       |             | Set 2       |             |
|--------------|-------------|------------------------------------------------------------------------|-------------|-------------|-------------|-------------|
|              |             |                                                                        | Fold Change | q value (%) | Fold Change | q value (%) |
| 201909_at    | RPS4Y1*     | ribosomal protein S4, Y-linked 1                                       | 7.5         | 1.7         | 1.6         | 1.8         |
| 205000_at    | DDX3Y*      | DEAD (Asp-Glu-Ala-Asp) box polypeptide 3, Y-linked                     | 7.5         | 1.7         | 1.8         | 1.8         |
| 204409_s_at  | EIF1AY*     | eukaryotic translation initiation factor 1A, Y-linked                  | 21.6        | 1.7         | 3.2         | 1.2         |
| 204410_at    | EIF1AY*     | eukaryotic translation initiation factor 1A, Y-linked                  | 14.4        | 1.9         | 3.2         | 1.2         |
| 206700_s_at  | JARID1D*    | jumonji, AT rich interactive domain 1D                                 | 3.7         | 1.9         | 1.7         | 2.1         |
| 244482_at    | EIF1AY*     | Eukaryotic translation initiation factor 1A, Y-linked                  | 8.1         | 1.9         | 3.5         | 1.0         |
| 223646_s_at  | CYorf15B*   | chromosome Y open reading frame 15B                                    | 5.1         | 2.1         | 1.5         | 2.5         |
| 228492_at    | USP9Y*      | ubiquitin specific peptidase 9, Y-linked (fat facets-like, Drosophila) | 4.5         | 2.1         | 1.6         | 2.5         |
| 206624_at    | USP9Y*      | ubiquitin specific peptidase 9, Y-linked (fat facets-like, Drosophila) | 5.9         | 2.1         | 1.5         | 2.5         |
| 214131_at    | CYorf15B*   | chromosome Y open reading frame 15B                                    | 3.2         | 2.4         | 1.6         | 2.5         |
| 223645_s_at  | CYorf15B*   | chromosome Y open reading frame 15B                                    | 5.3         | 2.4         | 1.6         | 3.1         |

|             |                                     |                                                                                  |      |     |      |     |
|-------------|-------------------------------------|----------------------------------------------------------------------------------|------|-----|------|-----|
| 205001_s_at | DDX3Y*                              | DEAD (Asp-Glu-Ala-Asp) box polypeptide 3, Y-linked                               | 7.4  | 2.4 | 1.8  | 2.5 |
| 207269_at   | DEFA4                               | defensin, alpha 4, corticostatin                                                 | 2.1  | 2.4 | 4.2  | 1.2 |
| 210322_x_at | UTY*                                | ubiquitously transcribed tetratricopeptide repeat gene, Y-linked                 | 5.0  | 2.4 | 2.2  | 1.8 |
| 220784_s_at | UTS2*                               | urotensin 2                                                                      | 22.8 | 2.4 | 11.0 | 4.1 |
| 220785_at   | UTS2*                               | urotensin 2                                                                      | 11.8 | 2.4 | 9.9  | 4.1 |
| 211149_at   | UTY*                                | ubiquitously transcribed tetratricopeptide repeat gene, Y-linked                 | 2.9  | 2.4 | 1.8  | 2.1 |
| 202468_s_at | CTNNAL1                             | catenin (cadherin-associated protein), alpha-like 1                              | 3.7  | 2.4 | 2.3  | 2.1 |
| 227194_at   | FAM3B                               | family with sequence similarity 3, member B                                      | 4.9  | 2.4 | 3.6  | 1.0 |
| 207808_s_at | PROS1                               | protein S (alpha)                                                                | 3.7  | 2.4 | 1.8  | 3.6 |
| 216956_s_at | ITGA2B                              | integrin, alpha 2b (platelet glycoprotein IIb of IIb/IIIa complex, antigen CD41) | 3.7  | 2.4 | 1.7  | 2.1 |
| 205033_s_at | DEFA1 ///<br>DEFA3 ///<br>LOC728358 | defensin, alpha 1 /// defensin, alpha 3, neutrophil-specific                     | 1.7  | 2.4 | 2.3  | 2.5 |
| 207414_s_at | PCSK6                               | proprotein convertase subtilisin/kexin type 6                                    | 3.1  | 2.4 | 2.0  | 1.8 |
| 207601_at   | SULT1B1                             | sulfotransferase family, cytosolic, 1B, member 1                                 | 2.3  | 2.4 | 2.2  | 4.1 |
| 215150_at   | YOD1                                | YOD1 OTU deubiquinating enzyme 1 homolog ( <i>S. cerevisiae</i> )                | 5.5  | 2.4 | 1.8  | 3.6 |

|             |         |                                                                                     |     |     |     |     |
|-------------|---------|-------------------------------------------------------------------------------------|-----|-----|-----|-----|
| 219090_at   | SLC24A3 | solute carrier family 24<br>(sodium/potassium/calcium exchanger),<br>member 3       | 4.3 | 2.4 | 2.0 | 1.0 |
| 212651_at   | RHOBTB1 | Rho-related BTB domain containing 1                                                 | 1.9 | 2.4 | 1.8 | 3.1 |
| 204628_s_at | ITGB3   | integrin, beta 3 (platelet glycoprotein<br>IIIa, antigen CD61)                      | 2.8 | 2.4 | 1.8 | 1.2 |
| 202729_s_at | LTBP1   | latent transforming growth factor beta<br>binding protein 1                         | 2.5 | 2.4 | 1.5 | 3.1 |
| 203021_at   | SLPI    | secretory leukocyte peptidase inhibitor                                             | 2.0 | 2.4 | 2.4 | 1.0 |
| 206698_at   | XK*     | X-linked Kx blood group (McLeod<br>syndrome)                                        | 2.3 | 2.4 | 3.2 | 1.0 |
| 206494_s_at | ITGA2B  | integrin, alpha 2b (platelet glycoprotein<br>IIb of IIb/IIIa complex, antigen CD41) | 2.5 | 2.4 | 1.8 | 1.8 |
| 1560800_at  | ---     | MRNA; cDNA DKFZp667C0715 (from<br>clone DKFZp667C0715)                              | 2.1 | 2.4 | 1.7 | 3.6 |
| 205110_s_at | FGF13   | fibroblast growth factor 13                                                         | 2.1 | 2.4 | 2.0 | 3.1 |
| 214073_at   | ALDH1A3 | Aldehyde dehydrogenase 1 family,<br>member A3                                       | 2.2 | 2.4 | 2.4 | 2.5 |
| 1556923_at  | ACOX1   | Acyl-Coenzyme A oxidase 1                                                           | 2.0 | 2.4 | 1.6 | 2.1 |
| 206493_at   | ITGA2B  | integrin, alpha 2b (platelet glycoprotein<br>IIb of IIb/IIIa complex, antigen CD41) | 2.3 | 2.4 | 1.8 | 2.1 |
| 212667_at   | SPARC   | secreted protein, acidic, cysteine-rich<br>(osteonectin)                            | 3.1 | 2.4 | 2.3 | 0.8 |
| 201058_s_at | MYL9    | myosin, light chain 9, regulatory                                                   | 2.4 | 2.4 | 2.8 | 1.8 |
| 209369_at   | ANXA3   | annexin A3                                                                          | 2.0 | 2.4 | 2.1 | 3.1 |

|              |           |                                                                                                |     |     |     |     |
|--------------|-----------|------------------------------------------------------------------------------------------------|-----|-----|-----|-----|
| 228950_s_at  | GPR177    | G protein-coupled receptor 177                                                                 | 1.9 | 2.4 | 2.1 | 1.2 |
| 204627_s_at  | ITGB3     | integrin, beta 3 (platelet glycoprotein IIIa, antigen CD61)                                    | 2.6 | 2.4 | 2.1 | 2.1 |
| 1552583_s_at | ABCC13    | ATP-binding cassette, sub-family C (CFTR/MRP), member 13                                       | 1.6 | 2.4 | 5.0 | 3.6 |
| 201108_s_at  | THBS1     | thrombospondin 1                                                                               | 2.0 | 2.4 | 2.0 | 2.5 |
| 228949_at    | GPR177    | G protein-coupled receptor 177                                                                 | 1.7 | 2.4 | 1.8 | 1.8 |
| 205003_at    | DOCK4     | dedicator of cytokinesis 4                                                                     | 1.6 | 2.4 | 2.2 | 1.8 |
| 228753_at    | ---       | Transcribed locus, moderately similar to XP_001148836.1 hypothetical protein [Pan troglodytes] | 1.9 | 2.4 | 1.8 | 1.5 |
| 223670_s_at  | HEMGN     | hemogen                                                                                        | 2.0 | 2.4 | 3.4 | 2.1 |
| 213338_at    | TMEM158   | transmembrane protein 158                                                                      | 2.1 | 2.4 | 2.2 | 2.5 |
| 230354_at    | ---       | Transcribed locus                                                                              | 1.5 | 2.4 | 1.9 | 3.6 |
| 221958_s_at  | GPR177    | G protein-coupled receptor 177                                                                 | 1.7 | 2.4 | 1.8 | 1.2 |
| 206176_at    | BMP6      | bone morphogenetic protein 6                                                                   | 1.5 | 2.4 | 1.7 | 1.5 |
| 241420_at    | LOC728262 | Hypothetical protein LOC728262                                                                 | 2.1 | 2.4 | 8.9 | 2.1 |
| 236402_at    | ---       | CDNA FLJ42263 fis, clone TKIDN2014570                                                          | 1.9 | 2.4 | 1.6 | 3.1 |
| 229778_at    | C12orf39  | Chromosome 12 open reading frame 39                                                            | 2.2 | 2.4 | 1.7 | 1.5 |
| 1566964_at   | ---       | ---                                                                                            | 2.6 | 2.4 | 1.7 | 3.1 |
| 1557924_s_at | ALPL      | alkaline phosphatase, liver/bone/kidney                                                        | 2.7 | 2.4 | 2.4 | 1.2 |

|             |               |                                                                                                                 |     |     |     |     |
|-------------|---------------|-----------------------------------------------------------------------------------------------------------------|-----|-----|-----|-----|
| 201904_s_at | CTDSPL        | CTD (carboxy-terminal domain, RNA polymerase II, polypeptide A) small phosphatase-like                          | 1.6 | 2.4 | 1.8 | 2.1 |
| 230972_at   | ANKRD9        | ankyrin repeat domain 9                                                                                         | 2.2 | 2.4 | 2.2 | 2.5 |
| 229421_s_at | FLJ20273      | RNA-binding protein                                                                                             | 2.0 | 2.4 | 1.5 | 2.1 |
| 232080_at   | HECW2         | HECT, C2 and WW domain containing E3 ubiquitin protein ligase 2                                                 | 2.5 | 2.4 | 1.9 | 1.8 |
| 237340_at   | SLC26A8       | Solute carrier family 26, member 8                                                                              | 2.0 | 2.4 | 3.0 | 0.8 |
| 1559756_at  | DKFZp667F0711 | Hypothetical protein DKFZp667F0711                                                                              | 2.0 | 2.4 | 1.9 | 1.0 |
| 207206_s_at | ALOX12        | Arachidonate 12-lipoxygenase                                                                                    | 1.7 | 2.4 | 1.9 | 2.1 |
| 206167_s_at | ARHGAP6       | Rho GTPase activating protein 6                                                                                 | 1.6 | 2.4 | 1.8 | 2.5 |
| 238983_at   | NSUN7         | NOL1/NOP2/Sun domain family, member 7                                                                           | 2.0 | 2.4 | 2.0 | 1.2 |
| 224534_at   | KREMEN1       | Kringle containing transmembrane protein 1 /// kringle containing transmembrane protein 1                       | 2.0 | 2.4 | 2.0 | 2.5 |
| 225142_at   | KIAA1718      | KIAA1718 protein                                                                                                | 1.6 | 2.4 | 1.5 | 1.2 |
| 238320_at   | TncRNA        | Trophoblast-derived noncoding RNA                                                                               | 3.2 | 2.4 | 2.2 | 1.0 |
| 200665_s_at | SPARC         | Secreted protein, acidic, cysteine-rich (osteonectin) /// secreted protein, acidic, cysteine-rich (osteonectin) | 1.7 | 2.4 | 1.9 | 2.1 |
| 208116_s_at | MAN1A1        | Mannosidase, alpha, class 1A, member 1                                                                          | 2.0 | 2.4 | 1.6 | 2.1 |
| 214074_s_at | CTTN          | Cortactin                                                                                                       | 1.7 | 2.4 | 1.6 | 3.1 |

|              |          |                                                                                        |     |     |     |     |
|--------------|----------|----------------------------------------------------------------------------------------|-----|-----|-----|-----|
| 1558549_s_at | VNN1     | Vanin 1                                                                                | 1.6 | 2.4 | 1.8 | 3.6 |
| 207815_at    | PF4V1    | Platelet factor 4 variant 1                                                            | 1.8 | 2.4 | 2.0 | 3.1 |
| 210999_s_at  | GRB10    | Growth factor receptor-bound protein 10                                                | 1.8 | 2.4 | 1.5 | 1.0 |
| 212793_at    | DAAM2    | dishevelled associated activator of morphogenesis 2                                    | 7.0 | 2.4 | 1.6 | 3.6 |
| 201059_at    | CTTN     | Cortactin                                                                              | 1.5 | 2.4 | 1.7 | 3.6 |
| 201906_s_at  | CTDSPL   | CTD (carboxy-terminal domain, RNA polymerase II, polypeptide A) small phosphatase-like | 1.7 | 2.4 | 1.9 | 1.8 |
| 227309_at    | YOD1     | YOD1 OTU deubiquinating enzyme 1 homolog ( <i>S. cerevisiae</i> )                      | 2.2 | 2.4 | 1.5 | 3.1 |
| 206049_at    | SELP     | Selectin P (granule membrane protein 140kDa, antigen CD62)                             | 1.7 | 2.4 | 1.6 | 4.1 |
| 221484_at    | B4GALT5  | UDP-Gal:betaGlcNAc beta 1,4-galactosyltransferase, polypeptide 5                       | 2.6 | 2.4 | 2.1 | 3.1 |
| 223669_at    | HEMGN    | Hemogen                                                                                | 1.7 | 2.4 | 1.9 | 3.6 |
| 210594_x_at  | MPZL1    | Myelin protein zero-like 1                                                             | 2.0 | 2.4 | 1.5 | 2.5 |
| 215078_at    | SOD2     | Superoxide dismutase 2, mitochondrial                                                  | 1.7 | 2.4 | 2.8 | 1.5 |
| 1565597_at   | FLJ20273 | RNA-binding protein                                                                    | 1.6 | 2.4 | 2.1 | 1.8 |
| 215240_at    | ITGB3    | Integrin, beta 3 (platelet glycoprotein IIIa, antigen CD61)                            | 1.9 | 2.4 | 1.8 | 2.1 |
| 225369_at    | ESAM     | Endothelial cell adhesion molecule                                                     | 1.6 | 2.4 | 1.5 | 2.5 |
| 204713_s_at  | F5       | Coagulation factor V (proaccelerin, labile factor)                                     | 1.8 | 2.4 | 1.8 | 2.5 |

|              |                    |                                                                                             |     |     |     |     |
|--------------|--------------------|---------------------------------------------------------------------------------------------|-----|-----|-----|-----|
| 205566_at    | ABHD2              | Abhydrolase domain containing 2                                                             | 1.5 | 2.4 | 1.7 | 2.1 |
| 203305_at    | F13A1              | Coagulation factor XIII, A1 polypeptide                                                     | 1.6 | 2.4 | 1.5 | 1.8 |
| 1569190_at   | SCLT1              | Sodium channel and clathrin linker 1                                                        | 1.6 | 2.4 | 1.6 | 3.6 |
| 206655_s_at  | GP1BB ///<br>SEPT5 | Glycoprotein Ib (platelet), beta<br>polypeptide /// septin 5                                | 1.6 | 2.4 | 1.8 | 3.6 |
| 202948_at    | IL1R1              | Interleukin 1 receptor, type I                                                              | 1.6 | 2.4 | 2.0 | 0.4 |
| 215977_x_at  | GK                 | Glycerol kinase                                                                             | 1.6 | 2.4 | 1.8 | 1.5 |
| 205896_at    | SLC22A4            | Solute carrier family 22 (organic cation<br>transporter), member 4                          | 1.6 | 2.4 | 1.8 | 1.0 |
| 216316_x_at  | GK /// GK3P        | Glycerol kinase /// glycerol kinase 3<br>pseudogene                                         | 1.6 | 2.4 | 1.7 | 1.8 |
| 205127_at    | PTGS1              | Prostaglandin-endoperoxide synthase 1<br>(prostaglandin G/H synthase and<br>cyclooxygenase) | 1.9 | 2.4 | 1.8 | 2.1 |
| 225354_s_at  | SH3BGR2            | SH3 domain binding glutamic acid-rich<br>protein like 2                                     | 1.7 | 2.4 | 1.8 | 2.1 |
| 1555659_a_at | TREML1             | Triggering receptor expressed on<br>myeloid cells-like 1                                    | 1.9 | 2.4 | 2.1 | 2.5 |
| 208792_s_at  | CLU                | Clusterin                                                                                   | 1.5 | 2.4 | 1.9 | 2.1 |
| 211372_s_at  | IL1R2              | Interleukin 1 receptor, type II                                                             | 1.6 | 2.4 | 1.8 | 1.5 |
| 230778_at    | ---                | Transcribed locus                                                                           | 1.6 | 2.4 | 1.6 | 0.8 |
| 203888_at    | THBD               | Tthrombomodulin                                                                             | 1.5 | 2.4 | 1.7 | 3.1 |
| 240156_at    | RFX2               | Regulatory factor X, 2 (influences HLA<br>class II expression)                              | 1.8 | 2.4 | 1.7 | 2.5 |

|             |                                |                                                                               |     |     |     |     |
|-------------|--------------------------------|-------------------------------------------------------------------------------|-----|-----|-----|-----|
| 57588_at    | SLC24A3                        | Solute carrier family 24<br>(sodium/potassium/calcium exchanger),<br>member 3 | 1.9 | 2.4 | 1.9 | 1.2 |
| 233312_at   | ROPN1L /<br>PODN<br>/LOC728124 | Ropporin 1-likehypotheticalprotein<br>LOC728124                               | 1.8 | 2.4 | 2.0 | 1.2 |
| 243611_at   | MICALCL                        | MICAL C-terminal like                                                         | 1.8 | 2.4 | 1.7 | 2.1 |
| 203661_s_at | TMOD1                          | Tropomodulin 1                                                                | 1.6 | 2.4 | 2.4 | 2.5 |
| 223609_at   | ROPN1L                         | Ropporin 1-like                                                               | 1.5 | 2.4 | 2.1 | 1.8 |
| 216925_s_at | TAL1                           | T-cell acute lymphocytic leukemia 1                                           | 1.5 | 2.4 | 2.3 | 3.1 |
| 239701_at   | ENTPD1                         | Ectonucleoside triphosphate<br>diphosphohydrolase 1                           | 1.5 | 2.4 | 1.7 | 1.2 |
| 226152_at   | TTC7B                          | Tetratricopeptide repeat domain 7B                                            | 1.6 | 2.4 | 1.6 | 2.5 |
| 206464_at   | BMX                            | BMX non-receptor tyrosine kinase                                              | 1.6 | 2.4 | 2.9 | 2.5 |
| 230585_at   | ---                            | Transcribed locus                                                             | 1.7 | 2.4 | 2.0 | 1.2 |
| 239464_at   | ---                            | ---                                                                           | 2.0 | 2.4 | 1.8 | 1.8 |
| 233700_at   | PPP1R12B                       | Protein phosphatase 1, regulatory<br>(inhibitor) subunit 12B                  | 1.6 | 2.4 | 1.5 | 2.5 |
| 237071_at   | ---                            | Transcribed locus                                                             | 1.5 | 2.4 | 1.5 | 3.6 |
| 208488_s_at | CR1                            | Complement component (3b/4b)<br>receptor 1                                    | 1.5 | 2.4 | 1.9 | 1.0 |
| 215990_s_at | BCL6                           | B-cell CLL/lymphoma 6 (zinc finger<br>protein 51)                             | 1.8 | 2.4 | 3.0 | 1.0 |
| 1558959_at  | ---                            | CDNA FLJ37917 fis, clone<br>CTONG1000137                                      | 2.2 | 2.4 | 1.7 | 2.1 |



|              |         |                                                                                |     |     |     |     |
|--------------|---------|--------------------------------------------------------------------------------|-----|-----|-----|-----|
| 207201_s_at  | SLC22A1 | Solute carrier family 22 (organic cation transporter), member 1                | 1.6 | 2.4 | 2.7 | 2.1 |
| 206877_at    | MXD1    | MAX dimerization protein 1                                                     | 1.6 | 2.4 | 2.8 | 1.5 |
| 211087_x_at  | MAPK14  | Mitogen-activated protein kinase 14 ///<br>mitogen-activated protein kinase 14 | 1.5 | 2.4 | 1.6 | 1.8 |
| 1554892_a_at | MS4A3   | Membrane-spanning 4-domains,<br>subfamily A, member 3                          | 1.7 | 2.4 | 1.8 | 3.1 |
| 224588_at    | XIST*   | X (inactive)-specific transcript                                               | 0.5 | 2.6 | 0.3 | 0.4 |
| 224589_at    | XIST*   | X (inactive)-specific transcript                                               | 0.1 | 3.0 | 0.2 | 0.4 |
| 221728_x_at  | XIST*   | X (inactive)-specific transcript                                               | 0.4 | 3.0 | 0.2 | 0.4 |
| 227671_at    | XIST*   | X (inactive)-specific transcript                                               | 0.4 | 3.0 | 0.2 | 0.4 |
| 214218_s_at  | XIST*   | X (inactive)-specific transcript                                               | 0.4 | 3.0 | 0.2 | 0.4 |
| 224590_at    | XIST*   | X (inactive)-specific transcript                                               | 0.4 | 3.0 | 0.2 | 0.4 |
| 221690_s_at  | NLRP2   | NLR family, pyrin domain containing 2                                          | 0.4 | 4.3 | 0.6 | 1.5 |
| 239591_at    | ---     | Transcribed locus                                                              | 0.1 | 4.9 | 0.3 | 0.5 |
| 211010_s_at  | NCR3    | Natural cytotoxicity triggering receptor 3                                     | 0.4 | 4.9 | 0.6 | 0.4 |
| 216050_at    | ---     | CDNA: FLJ20931 fis, clone<br>ADSE01282                                         | 0.3 | 4.9 | 0.5 | 0.4 |
